# Supplementary material for: A facile strategy to fabricate a lignin-based thermoset alternative to formaldehyde-based wood adhesives
Source: Royal Society of Chemistry journal article supplement (doi:10.1039/d3gc00763d), 2023-01-01
Supplement: d3gc00763d1.pdf [file d3gc00763d1.pdf]

# **A facile strategy to fabricate lignin-based thermoset alternative to formaldehyde-based wood adhesives**

*Xiaoyu Shi<sup>a,b</sup>, Shishuai Gao<sup>a</sup>, Can Jin<sup>a</sup>, Daihui Zhang<sup>\*a,b,c</sup>, Chenhuan Lai<sup>b\*</sup>, Chunpeng*

*Wang<sup>a,b</sup>, Fuxiang Chu<sup>a,b</sup>, Arthur J Ragauskas<sup>d,e,f,g</sup>, Mi Li<sup>d\*</sup>*

a. Institute of Chemical Industry of Forest Products, Chinese Academy of Forestry (CAF), Jiangsu Province, No 16, Suojin Wucun, Nanjing 210042, China.

b. Jiangsu Co-Innovation Center of Efficient Processing and Utilization of Forest Resources, Nanjing Forestry University, Nanjing 210037, China.

c. Key Laboratory of Wood Material Science and Application, Ministry of Education; MOE Engineering Research Center of Forestry Biomass Materials and Energy, Beijing Forestry University, 100083, Beijing, China

d. Center for Renewable Carbon, School of Natural Resources, The University of Tennessee, Knoxville, TN 37996, USA

e. Department of Chemical and Biomolecular Engineering, University of Tennessee, Knoxville, TN, 37996, USA

f. Center for Bioenergy Innovation, Biosciences Division, Oak Ridge National Laboratory, Oak Ridge, TN, 37831, USA

g. Joint Institute for Biological Science, Oak Ridge National Laboratory, Oak Ridge, TN, 37831, USA

### **Tensile properties.**

The tensile properties of the lignin based thermoset samples were determined by CMT4304 Universal Testing Machine. Before testing, the samples had the approximate dimensions of 25 mm × 4mm × 0.2 mm. The toughness was obtained from the stress–strain curve and the total area under the stress–strain curve.

### **Physical and mechanical properties of the samples**

The physical properties including density, moisture content, water absorption (WA) and thickness swelling (TS) were carried out according to the Chinese national standard GB/T 17657–2013. A size of 5 cm × 5 cm from each panel was cut for density, thickness swelling and water absorption test. The density was measured by taking the measurements of the length, width, thickness, and weight for each sample. Then, the volume was calculated. The moisture content value was taken from the average result of samples from each type of particleboard. Water absorption and thickness swelling were carried out simultaneously. Initially, the thickness and weight of each sample were recorded before immersing in water. After immersing for 24 h, the increase in thickness and weight of each sample were recorded.

The mechanical properties included modulus of rupture (MOR), modulus of elasticity (MOE) and internal bond (IB) strength were carried out according to the Chinese Industrial Standard. Samples with a size of 200 mm × 50 mm x 7.5 mm were cut from each panel for MOR and MOE tests. The Instron Tensile Machine CMT4304 was used with a crosshead speed of 10 mm/min. Span of supporting beam was 120 mm and a load was applied at the center of the sample. Besides, samples with a size of 50 mm ×

50 mm x 7.5 mm were cut from each panel for IB test. The Instron Tensile Machine CMT4304 was used with a crosshead speed of 10 mm/min for IB test.

### **Formaldehyde emission by desiccator method**

Formaldehyde emission from the produced particleboards was tested using desiccator method based on JIS A 1460: 2001. 300 ml of distilled water was filled into a glass crystalizing dish, which is centrally located at the bottom of the desiccator. Nine pieces of samples (50 mm width x 150 mm length x 12 mm thickness) having surface area approximately 1800 cm<sup>2</sup> were placed into a desiccator, right above the water-filled glass crystalizing dish. After 24 h, the water in the crystalizing dish was collected and the concentration of formaldehyde in the solution was measured by acetylacetonone molecular absorption spectrometry.

### **<sup>31</sup>P NMR**

Quantitative <sup>31</sup>P NMR spectra of the lignin was acquired by a Bruker AVANCE 600 MHz spectrometer. A solvent mixture composed of anhydrous pyridine and deuterated chloroform in a 1.6:1 (v/v ratio) was prepared. Chromium (III) acetylacetonate (5.6 mg/mL) solution and HONB (9.23 mg/mL) solution were prepared by utilizing the above solvent mixture, respectively. An accurately weighed amount (40 mg) of a dried sample was then dissolved in 500 μL of above solvent mixture. Thereafter, HONB solution (200 μL) and chromium (III) acetylacetonate solution (50 μL) were added. Finally, 100 μL of phosphitylating reagent (TMDP) was added and then quickly transferred into NMR tube for subsequent analysis.

### **Gel permeation chromatography**

Gel permeation chromatography (GPC) is equipped with Malvern Viscotek 3580 System, including Viscotek GPC2502 refractive detector, a GPC1007 pump, the columns were T6000M and GeneralMixed Org 300 mm × 7.8 mm (CLM3009). Calibration curve was generated using monodispersed polystyrene (PS) as a standard THF was used as the eluent at a flow rate of 1 mL/min. All samples were filtered over a microfilter with a pore size of 0.22 μm (Nylon, Millex-HN13mm Syringes Filters, Millipore) with the sample concentration of 3 mg/mL.

**Table S1.** the solid content and viscosity of lignin-based thermoset

| sample      | <sup>a</sup> solid content (wt%) | viscosity (mPa·s) |
|-------------|----------------------------------|-------------------|
| LD (1:0.75) | 25.3                             | 72.4              |
| LD (1:1)    | 27.9                             | 52.2              |
| LD (1:1.5)  | 32.6                             | 43.8              |
| LD (1:2)    | 36.7                             | 31.9              |

<sup>a</sup> The solids content is calculated by dividing the mass of the reactant (lignin and D2000) by the total mass of the sample multiplied by 100%.

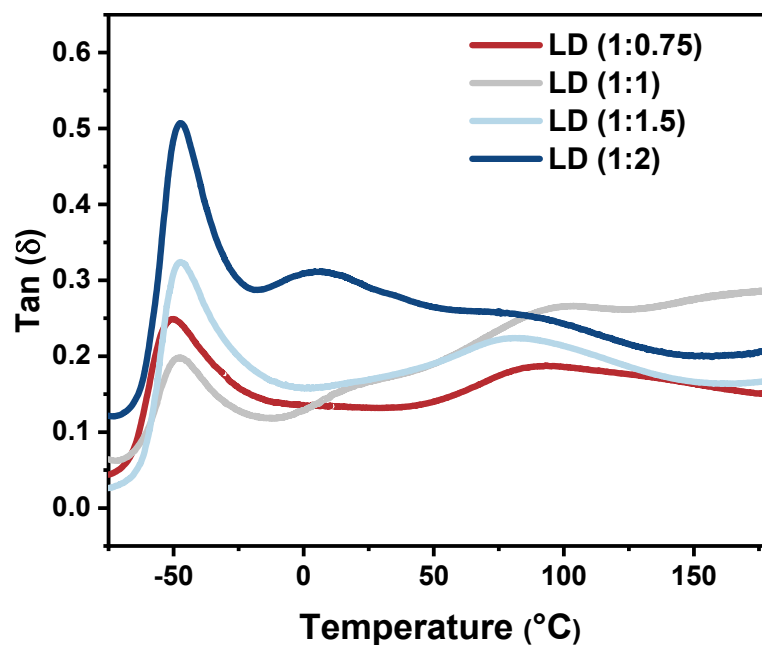

Figure S1. tan delta versus temperature for the thermosets with different lignin contents.

**Table S2.** Experimental D2000, Lignin and wood flours content

| Sample | D2000 (g) | Lignin (g) | Wood flours (g) |
|--------|-----------|------------|-----------------|
| LDW-1  | 12.0      | 9.0        | 18.0            |
| LDW-2  | 9.0       | 9.0        | 18.0            |
| LDW-3  | 6.0       | 9.0        | 18.0            |
| LDW-4  | 3.0       | 9.0        | 18.0            |
| LDW-5  | 1.5       | 9.0        | 18.0            |
| LDW-6  | 0.0       | 9.0        | 18.0            |
| LDW-7  | 3.0       | 9.0        | 18.0            |
| LDW-8  | 3.0       | 5.4        | 21.6            |
| LDW-9  | 3.0       | 1.7        | 25.3            |
| LDW-10 | 3.0       | 0.0        | 27.0            |

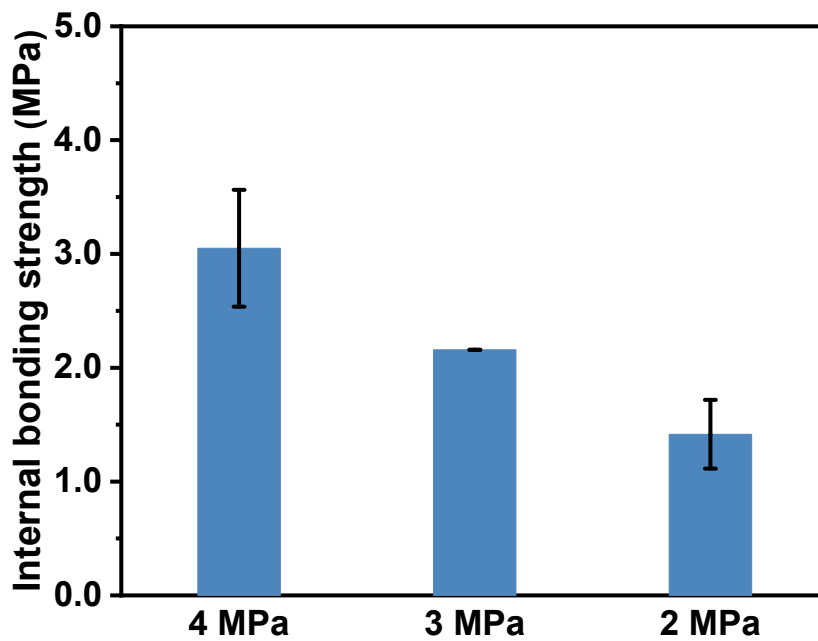

Figure S2. The internal bonding strength of particleboards with different pressures.

**Table S3.** Characterization of the Lignin Fractions.

| Sample      | Acid-insoluble<br>lignin (%) | Acid-soluble<br>lignin (%) | Glucan (%) | Xylan (%) |
|-------------|------------------------------|----------------------------|------------|-----------|
| populus     | 87.80±0.22                   | 3.11±0.02                  | 4.86±0.38  | 0.03±0.05 |
| corn stover | 94.37±0.13                   | 3.90±0.00                  | 0.00±0.00  | 0.77±0.00 |
| masson pine | 70.50±1.30                   | 1.51±0.03                  | 2.40±0.25  | 0.32±0.00 |

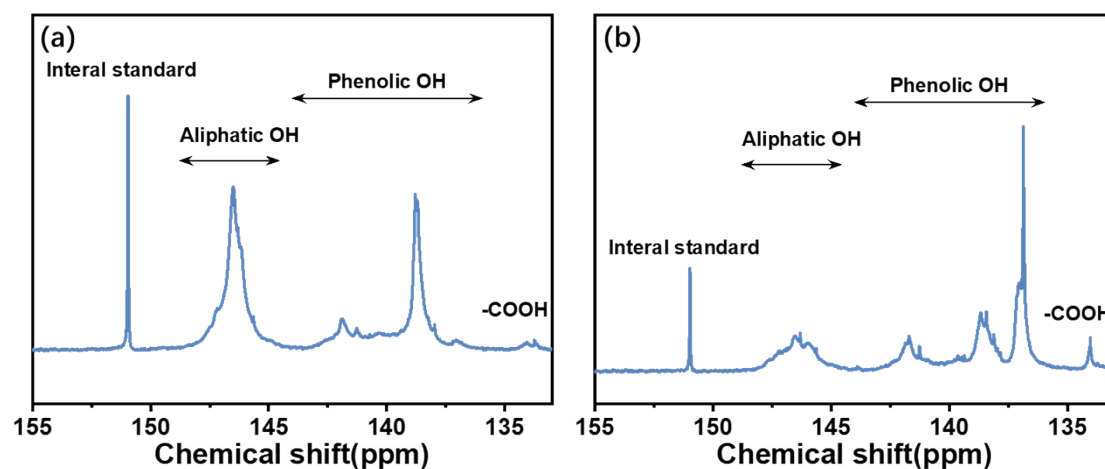

Figure S3. Quantitative  $^{31}\text{P}$  NMR spectra of SKL.

**Table S4.** Concentration of Aliphatic, Phenolic and Carboxylic OH of different lignin according to quantitative  $^{31}\text{P}$  NMR

| Sample      | Aliphatic OH<br>(mmol/g) | Phenolic<br>OH | Carboxylic<br>acid OH | Total OH<br>(mmol/g) |
|-------------|--------------------------|----------------|-----------------------|----------------------|
| populus     | 2.69                     | 2.51           | 0.09                  | 5.29                 |
| corn stover | 2.68                     | 6.89           | 0.43                  | 10.00                |

**Table S5.** Molecular weight and polydispersity index (PDI) of lignin

| Sample      | $M_w$ (g/mol) | $M_n$ (g/mol) | PDI ( $M_w/M_n$ ) |
|-------------|---------------|---------------|-------------------|
| populus     | 11870         | 8669          | 1.369             |
| corn stover | 5295          | 3429          | 1.544             |



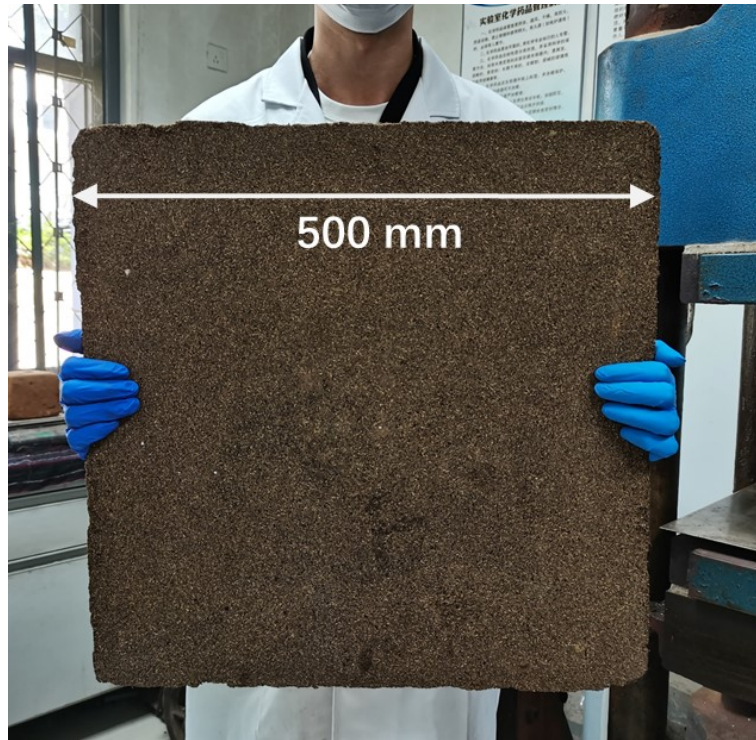

Figure S4. the size of the particleboards to 500 mm × 500 mm × 7.5 mm

**Table S6.** Physical properties of particleboards.

| Density<br>(kg/m <sup>3</sup> ) | <sup>a</sup> TS (%) | <sup>b</sup> WA (%) | <sup>c</sup> IB<br>(MPa) | <sup>d</sup> MOR<br>(MPa) | <sup>e</sup> MOE (MPa) |
|---------------------------------|---------------------|---------------------|--------------------------|---------------------------|------------------------|
| 830.73±2.62                     | 13.46±2.89          | 68.42±4.34          | 1.42±0.24                | 16.74±1.22                | 1831.80±205.62         |

<sup>a</sup> the thickness swelling (TS); <sup>b</sup> the water absorption (WA) values; <sup>c</sup> the internal bonding (IB) strength; <sup>d</sup> the modulus of rupture (MOR), and <sup>e</sup> the modulus of elasticity (MOE)

**Table S7.** Water resistance and aging resistance of the particleboards.

|          | Initial<br>sample | The samples soaked in<br>water for 24 hours | The samples stored in the<br>laboratory for 300 days |
|----------|-------------------|---------------------------------------------|------------------------------------------------------|
| IB (MPa) | 1.42±0.24         | 1.38±0.28                                   | 1.27±0.24                                            |

**Table S8.** Comparing the physical properties of particleboards with those of commercially available and under development wood adhesives

| Sample                | TS (%) | IB (MPa) | MOR (MPa) | MOE (MPa) |
|-----------------------|--------|----------|-----------|-----------|
| This work             | 13.46  | 1.42     | 16.74     | 1831.80   |
| <sup>a</sup> UF       | 16.76  | 0.65     | 16.38     | 3504.53   |
| <sup>b</sup> PF       | 14.75  | 0.74     | 19.81     | 3553.18   |
| <sup>c</sup> LPF+PVA  | 11.41  | 0.46     | 17.41     | 2405.11   |
| <sup>d</sup> PVAc+MDI | 13.4   | 0.70     | 19.22     | 2581.95   |
| <sup>e</sup> LPF+MDI  | 10.97  | 0.45     | 16.09     | 2482.46   |

<sup>a</sup> urea-formaldehyde; <sup>b</sup> phenol-formaldehyde; <sup>c</sup> lignin and polyvinyl alcohol; <sup>d</sup> polyvinyl acetate

and 4, 4'-diphenylmethane diisocyanate, and <sup>e</sup> lignin and 4, 4'-diphenylmethane diisocyanate.
